# Supplementary material for: Long-term effectiveness of a lifestyle intervention for rheumatoid arthritis and osteoarthritis: 1-year follow-up of the ‘Plants for Joints’ randomised clinical trial
Source: PubMed Central journal article supplement — RMD Open. 2024 Feb 27;10(1):e004025. doi: 10.1136/rmdopen-2023-004025 (PMC10900348; doi:10.1136/rmdopen-2023-004025), 2024-02-27
Supplement: rmdopen-2023-004025supp001.pdf [file rmdopen-2023-004025supp001.pdf]

**Supplementary table 1.** Anti-rheumatic medication use at start of intervention

|                                 | <b>n (%)</b> |
|---------------------------------|--------------|
| <b>Synthetic DMARD</b>          | 50 (63)      |
| Methotrexate                    | 32 (41)      |
| Hydroxychloroquine              | 7 (9)        |
| Sulfasalazine                   | 7 (9)        |
| Leflunomide                     | 4 (5)        |
| <b>Biological DMARD</b>         | 30 (38)      |
| TNF- $\alpha$ inhibitors        | 17 (21)      |
| Rituximab                       | 5 (6)        |
| Tocilizumab                     | 3 (4)        |
| Abatacept                       | 2 (3)        |
| <b>Targeted synthetic DMARD</b> | 3 (4)        |
| Baricitinib                     | 3 (4)        |
| <b>Other</b>                    | 16 (21)      |
| Prednisone                      | 13 (16)      |
| <b>No medication</b>            | 17 (22)      |

DMARD = Disease modifying anti-rheumatic agent. TNF- $\alpha$  inhibitors (Tumor Necrosis Factor alpha) include adalimumab, etanercept, golimumab. Medications shown as part of mono- or combination therapy.

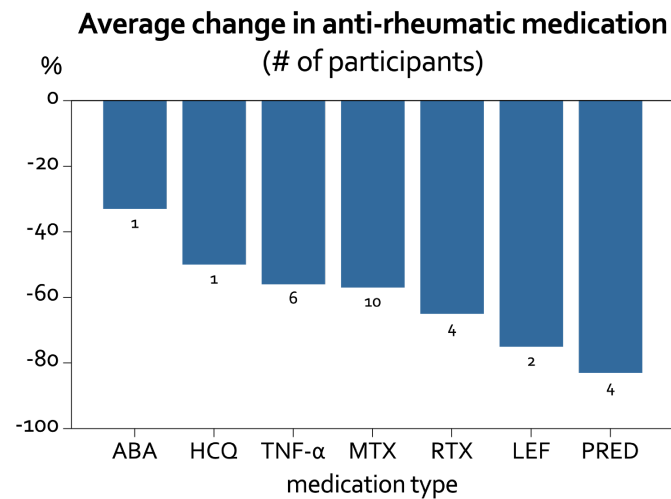

**Supplementary Figure 1.** Changes in anti-rheumatic medication for participants with rheumatoid arthritis at the end of the one year extension study as compared to the start of the intervention including the average percentage change in dosage for each type of anti-rheumatic medication. RA = anti-rheumatic medication, ABA = abatacept, HCQ = hydroxychloroquine, TNF- $\alpha$  = Tumor Necrosis Factor alpha (including adalimumab (n = 2) and etanercept (n = 4)), MTX = methotrexate, RTX = rituximab, LEF = leflunomide, PRED = prednisone.

**Supplementary Table 2.** Primary and secondary outcomes for rheumatoid arthritis participants of the Plants for Joints one-year extension study

|                                                    | Intervention      |                   |                   | Extension study   |                   | Within group difference (95% CI) | p-value |
|----------------------------------------------------|-------------------|-------------------|-------------------|-------------------|-------------------|----------------------------------|---------|
|                                                    | Start             | Halfway           | End               | 6 months          | 12 months         |                                  |         |
| <b>DAS28 in RA subgroups</b>                       |                   |                   |                   |                   |                   |                                  |         |
| Seropositive (n = 57)                              | 3.88 (0.92)       | 3.10 (1.07)       | 3.26 (1.29)       | 2.87 (1.02)       | 2.93 (1.11)       | -0.9 (-1.2 to -0.6)              | <0.0001 |
| Seronegative (n = 20)                              | 3.76 (0.67)       | 2.69 (1.04)       | 2.62 (0.87)       | 2.60 (0.95)       | 2.60 (0.98)       | -1.1 (-1.4 to -0.7)              | <0.0001 |
| <b>Rheumatoid arthritis-specific antibodies, n</b> |                   |                   |                   |                   |                   |                                  |         |
| Rheumatoid factor (kU/l)                           | 21.0 [1.2 - 69.0] | 16.0 [1.2 - 60.0] | 14.0 [1.5 - 59.5] | 12.0 [1.1 - 38.5] | 13.5 [1.3 - 39.5] | -0.3 (-6.0 to 3.1)†              | 0.8     |
| ACPA (kU/l)                                        | 48 [2 - 470]      | 41 [2 - 690]      | 47 [2 - 605]      | 38 [1 - 705]      | 73 [2 - 585]      | -1 (-34 to 7)†                   | 0.3     |
| <b>Body composition (DEXA)‡, n</b>                 |                   |                   |                   |                   |                   |                                  |         |
| Total body mass (kg)                               | 72                | 63                | 63                | 51                | 38                |                                  |         |
|                                                    | 74.6 (13.6)       |                   | 71.0 (13.0)       |                   | 70.4 (11.8)       | -1.3 (-2.1 to -0.5)              | 0.002   |
| Fat mass (kg)                                      | 29.6 (9.2)        |                   | 26.9 (9.1)        |                   | 26.1 (7.3)        | -1.1 (-1.8 to -0.4)              | 0.002   |
| Fat percentage (%)                                 | 40.0 (6.5)        |                   | 37.2 (6.9)        |                   | 36.7 (5.9)        | -0.8 (-1.4 to -0.1)              | 0.02    |
| Lean mass (kg)                                     | 42.7 (6.6)        |                   | 41.7 (6.2)        |                   | 41.8 (6.8)        | -0.4 (-0.8 to 0.0)               | 0.06    |
| ASMM (kg)                                          | 19.0 (3.6)        |                   | 18.4 (3.3)        |                   | 18.4 (3.5)        | -0.1 (-0.4 to 0.1)               | 0.2     |
| Bone density (g/cm <sup>2</sup> )                  | 1.12 (0.12)       |                   | 1.12 (0.13)       |                   | 1.12 (0.14)       | -0.01 (-0.02 to 0.00)            | 0.1     |
| T-score                                            | 0.35 (1.17)       |                   | 0.33 (1.25)       |                   | 0.35 (1.35)       | -0.03 (-0.16 to 0.11)            | 0.7     |
| <b>Patient-reported outcomes (PROMIS®), n</b>      |                   |                   |                   |                   |                   |                                  |         |
| Depression                                         | 71                | 59                | 67                | 51                | 38                |                                  |         |
|                                                    | 52 (7)            | 50 (8)            | 51 (6)            | 50 (7)            | 50 (7)            | -1 (-2 to 1)                     | 0.5     |
| Fatigue                                            | 53 [51 - 60]      | 52 [47 - 57]      | 51 [48 - 57]      | 52 [48 - 60]      | 51 [47 - 57]      | -1 (-4 to 1)                     | 0.4     |
| Pain interference                                  | 57 (7)            | 55 (7)            | 56 (7)            | 55 (7)            | 53 (6)            | -3 (-5 to -1)                    | 0.001   |
| Physical function                                  | 44 (5)            | 46 (6)            | 46 (7)            | 46 (7)            | 46 (5)            | 2 (0.0 to 3.0)                   | 0.06    |

Outcomes at start and end of the 4-month intervention period as well as during the 1-year extension study (6 and 12 months after completing the intervention). Continuous variables reported as mean (SD) when normally distributed or as median [IQR] when skewed. Within-group difference shown between start of the lifestyle intervention and end of the 12-month follow-up determined using the linear-mixed model when model assumptions were met. For variables in which model assumptions were not met (†) a linear-mixed model was performed after log transformation and within group differences were reported as median difference of complete paired values determined using a Wilcoxon test (p-values from the linear mixed model are shown, all were similar to the Wilcoxon test). ASMM = appendicular skeletal muscle mass. ‡41 participants (63%) underwent a DEXA scan one year after the end of the intervention of which 11 were taken up to six months later due to problems with scheduling, and COVID-19 restrictions.

**Supplementary Table 3.** Primary and secondary outcomes for osteoarthritis participants of the Plants for Joints one-year extension study

|                                               | Intervention |              |              | Extension study |              | Within group difference (95% CI) | p-value |
|-----------------------------------------------|--------------|--------------|--------------|-----------------|--------------|----------------------------------|---------|
|                                               | Start        | Halfway      | End          | 6 months        | 12 months    |                                  |         |
| <b>Body composition‡, n</b>                   | 62           |              | 53           |                 | 42           |                                  |         |
| Total body mass (kg)                          | 94.5 (15.5)  |              | 90.5 (14.4)  |                 | 93.3 (14.5)  | -3.4 (-4.6 to -2.3)              | <0.001  |
| Fat mass (kg)                                 | 41.9 (10.8)  |              | 38.8 (9.8)   |                 | 40.8 (10.4)  | -2.5 (-3.9 to -1.2)              | <0.001  |
| Fat percentage (%)                            | 44.0 (6.3)   |              | 42.6 (6.3)   |                 | 43.4 (6.7)   | -1.1 (-2.0 to -0.2)              | 0.02    |
| Lean mass (kg)                                | 49.9 (8.4)   |              | 49.1 (8.5)   |                 | 50.0 (7.8)   | -0.8 (-1.3 to -0.4)              | <0.001  |
| ASMM (kg)                                     | 22.9 (4.2)   |              | 22.4 (4.5)   |                 | 22.9 (4.1)   | -0.7 (-1.0 to -0.4)              | <0.001  |
| Bone density (g/cm <sup>2</sup> )             | 1.21 (0.15)  |              | 1.19 (0.14)  |                 | 1.19 (0.16)  | -0.02 (-0.03 to -0.01)           | 0.003   |
| T-score                                       | 1.09 (1.36)  |              | 0.97 (1.24)  |                 | 0.92 (1.45)  | -0.18 (-0.32 to -0.03)           | 0.02    |
| <b>Patient-reported outcomes (PROMIS®), n</b> | 58           | 50           | 50           | 38              | 25           |                                  |         |
| Depression                                    | 50 [48 - 58] | 49 [43 - 56] | 48 [45 - 55] | 49 [47 - 53]    | 49 [45 - 52] | -1 (-4 to 1)                     | 0.4     |
| Fatigue                                       | 53 [51 - 55] | 51 [47 - 57] | 52 [47 - 58] | 51 [44 - 57]    | 49 [47 - 57] | -3 (-5 to -1)                    | 0.01    |
| Pain interference                             | 61 [56 - 64] | 56 [52 - 61] | 57 [52 - 61] | 56 [52 - 60]    | 56 [51 - 58] | -6 (-8 to -3)                    | <0.001  |
| Physical function                             | 40 [39 - 44] | 43 [39 - 48] | 43 [39 - 48] | 44 [48 - 49]    | 44 [43 - 49] | 3 (2 to 5)                       | <0.001  |

Outcomes at start and end of the 4-month intervention period as well as during the 1-year extension study (6 and 12 months after completing the intervention). Continuous variables reported as mean (SD) when normally distributed or as median [IQR] when skewed. Within-group difference shown between start of the lifestyle intervention and end of the 12-month follow-up determined using the linear-mixed model. ASMM = appendicular skeletal muscle mass. ‡42 participants (86%) underwent a DEXA scan at the end of the one-year extension study of which ten were taken up to six months after the planned measurement due to problems with scheduling, and COVID-19 restrictions. These missing values could help explain the discrepancy found between the within group differences from the linear mixed models and descriptive data.

**Supplementary Table 4.** Medication changes for rheumatoid arthritis and osteoarthritis participants after the one-year Plants for Joints extension study

| Change within medication groups | Rheumatoid Arthritis, <i>n</i> (%) | Osteoarthritis, <i>n</i> (%) |
|---------------------------------|------------------------------------|------------------------------|
| <b>Anti-rheumatic</b>           | <b>56 (86)</b>                     | <b>N/A</b>                   |
| Medication increase             | 13 (23)                            |                              |
| Increase dosage                 | 0 (0)                              |                              |
| Added medication                | 6 (11)                             |                              |
| Switch (disease activity)       | 3 (5)                              |                              |
| ≥1 corticosteroid injection     | 4 (7)                              |                              |
| Stable medication               | 15 (27)                            |                              |
| No change                       | 13 (23)                            |                              |
| Switch (side-effects)           | 2 (4)                              |                              |
| Medication decrease             | 28 (50)                            |                              |
| Decrease dosage                 | 18 (32)                            |                              |
| Stop medication                 | 10 (18)                            |                              |
| <b>Pain</b>                     | <b>25 (39)</b>                     | <b>18 (37)</b>               |
| Medication increase             | 6 (24)                             | 4 (22)                       |
| Increase dosage                 | 0 (0)                              | 0 (0)                        |
| Added medication                | 5 (20)                             | 3 (17)                       |
| Switch (disease activity)       | 1 (4)                              | 1 (6)                        |
| Stable medication               | 5 (20)                             | 2 (11)                       |
| No change                       | 5 (20)                             | 2 (11)                       |
| Switch (side-effects)           | 0 (0)                              | 0 (0)                        |
| Medication decrease             | 14 (56)                            | 12 (67)                      |
| Decrease dosage                 | 2 (8)                              | 1 (6)                        |
| Stop medication                 | 12 (48)                            | 11 (61)                      |
| <b>Cholesterol-lowering</b>     | <b>7 (11)</b>                      | <b>18 (37)</b>               |
| Medication increase             | 0 (0)                              | 1 (6)                        |
| Increase dosage                 | 0 (0)                              | 0 (0)                        |
| Added medication                | 0 (0)                              | 1 (6)                        |
| Switch (disease activity)       | 0 (0)                              | 0 (0)                        |
| Stable medication               | 6 (86)                             | 9 (50)                       |
| No change                       | 6 (86)                             | 8 (44)                       |
| Switch (side-effects)           | 0 (0)                              | 1 (6)                        |
| Medication decrease             | 1 (14)                             | 8 (44)                       |
| Decrease dosage                 | 1 (14)                             | 2 (11)                       |
| Stop medication                 | 0 (0)                              | 6 (33)                       |
| <b>Antihypertensive</b>         | <b>14 (22)</b>                     | <b>30 (61)</b>               |
| Medication increase             | 6 (43)                             | 4 (13)                       |
| Increase dosage                 | 0 (0)                              | 1 (3)                        |
| Added medication                | 5 (36)                             | 1 (3)                        |
| Switch (disease activity)       | 1 (7)                              | 2 (7)                        |
| Stable medication               | 5 (36)                             | 21 (70)                      |
| No change                       | 5 (36)                             | 21 (70)                      |
| Switch (side-effects)           | 0 (0)                              | 0 (0)                        |
| Medication decrease             | 3 (21)                             | 5 (17)                       |
| Decrease dosage                 | 0 (0)                              | 2 (7)                        |
| Stop medication                 | 3 (21)                             | 3 (10)                       |
| <b>Glucose-lowering</b>         | <b>2 (3)</b>                       | <b>9 (18)</b>                |
| Medication increase             | 0 (0)                              | 1 (11)                       |
| Increase dosage                 | 0 (0)                              | 1 (11)                       |
| Added medication                | 0 (0)                              | 0 (0)                        |
| Switch (disease activity)       | 0 (0)                              | 0 (0)                        |
| Stable medication               | 1 (50)                             | 5 (56)                       |
| No change                       | 1 (50)                             | 5 (56)                       |
| Switch (side-effects)           | 0 (0)                              | 0 (0)                        |
| Medication decrease             | 1 (50)                             | 3 (33)                       |
| Decrease dosage                 | 0 (0)                              | 2 (22)                       |
| Stop medication                 | 1 (50)                             | 1 (11)                       |

**Supplementary Table 5.** Increased and decreased anti-rheumatic medication use for rheumatoid arthritis participants at the end of the one-year Plants for Joints extension study**Increase****Switch medication (disease activity)**

Etanercept 50 mg/week switch to Tocilizumab (s.c.) 162 mg/week, Sulfasalazine 3000 mg/day to 2000 mg/day  
 Etanercept 50 mg/week switch to Adalimumab 40 mg/2 weeks and switch to Tocilizumab (s.c.) 162 mg/2 weeks, Prednisone 15 mg/day stopped, Methotrexate 7.5 mg/week started  
 Etanercept 50 mg/week switch to Adalimumab 40 mg/2 weeks and switch to Abatacept (s.c.) 125 mg/week and stopped, Prednisone 5 mg/day start, Glucocorticoid injection (i.a.)

**Added medication**

Hydroxychloroquine 200 mg started  
 Hydroxychloroquine 200 mg/day started, Sulfasalazine 2000 mg/day to 1500 mg/day, Glucocorticoid injection (i.a.)  
 Leflunomide 10 mg/day started  
 Methotrexate 10 mg/week started  
 Methotrexate 15 mg/week started  
 Methotrexate 20 mg/week start, hydroxychloroquine 200 mg/day start, Glucocorticoid injection (i.m.), Prednisone 5 mg/day start, Etanercept 50 mg/week start

**≥ 1 Glucocorticoid injection**

Glucocorticoid injection (i.a.)  
 Glucocorticoid injection (i.m.)  
 Glucocorticoid injection (i.m.)  
 Glucocorticoid injection (i.m.), Prednisone 5 mg/day stopped

**Decrease****Decrease dosage / increase interval**

Abatacept (i.v.) 750 mg/4 weeks to 500 mg/4 weeks  
 Etanercept 50 mg/week to 25 mg/week  
 Etanercept 50 mg/week to 50 mg/10 days  
 Etanercept 50 mg/week to 50 mg/2 weeks  
 Etanercept 50 mg/week to 50 mg/4 weeks  
 Hydroxychloroquine 400 mg/day to 200 mg/day  
 Leflunomide 20 mg/day to 10 mg/day  
 Methotrexate 15 mg/week to 10 mg/week  
 Methotrexate 15 mg/week to 10 mg/week  
 Methotrexate 20 mg/week to 15 mg/week  
 Methotrexate 20 mg/week to 15 mg/week  
 Methotrexate 22.5 mg/week to 5 mg/week  
 Methotrexate 25 mg/week to 15 mg/week  
 Methotrexate 25mg/week to 15 mg/week  
 Prednisone 7.5 mg/day to 5 mg/day  
 Rituximab 1000 mg/6 months to 1000 mg/12 months  
 Rituximab 1000 mg/6 months to 1000 mg/12 months  
 Rituximab 500 mg/6 months to 200 mg/6 months

**Stopped one medication**

Methotrexate 17.5 mg/week to 10 mg/week, hydroxychloroquine 200 mg/day stopped  
 Prednisone 10 mg/day stopped  
 Prednisone 2.5 mg/day stopped  
 Rituximab 1000 mg/6 months stopped  
 Sulfasalazine 1500 mg/day stopped, adalimumab 40 mg/2 weeks to 40 mg/3 weeks

**Stopped all anti-rheumatic medication**

Adalimumab 20 mg/week stopped  
 Leflunomide 20 mg/day stopped  
 Methotrexate 30 mg/week stopped  
 Methotrexate 7.5 mg/week stopped  
 Prednisone 7.5 mg/day stopped

Changes shown between start of the intervention and at the end of the one-year extension study. i.m. = intra muscular injection, i.a. = intra-articular injection, s.c. = subcutaneous injection.

**Supplementary Table 6.** Lifestyle descriptives for rheumatoid arthritis participants in the Plants for Joints one-year extension study

|                                           | Intervention       |                    |                    | Extension study    |                    |
|-------------------------------------------|--------------------|--------------------|--------------------|--------------------|--------------------|
|                                           | Start              | Halfway            | End                | 6 months           | 12 months          |
| <b>Diet characteristics, n</b>            | 65                 | 56                 | 49                 | 44                 | 49                 |
| Energy, kcal                              | 1737 (324)         | 1686 (342)         | 1706 (332)         | 1798 (281)         | 1833 (282)         |
| Fat, g                                    | 71.7 [62.3 - 81.0] | 73.1 [56.9 - 80.4] | 71.0 [59.6 - 81.4] | 75.4 [63.8 - 88.3] | 81.5 [64.8 - 91.4] |
| Fat, energy%                              | 37.2 (5.9)         | 38.0 (7.0)         | 36.6 (5.5)         | 37.5 (5.7)         | 38.5 (5.6)         |
| Saturated fat, g                          | 23.0 [16.4 - 28.3] | 13.9 [11.3 - 17.1] | 14.0 [10.5 - 18.6] | 17.0 [13.0 - 22.3] | 18.5 [14.9 - 24.2] |
| Saturated fat, energy%                    | 11.8 [9.7 - 14.1]  | 7.3 [6.2 - 8.9]    | 7.7 [6.3 - 9.4]    | 8.7 [6.8 - 10.7]   | 9.1 [7.4 - 11.3]   |
| Carbohydrate, g                           | 186.3 (42.4)       | 186.8 (40.3)       | 186.4 (45.3)       | 189.1 (43.4)       | 193.9 (38.1)       |
| Carbohydrate, energy%                     | 43.0 [39.0 - 47.0] | 44.0 [41.0 - 48.0] | 45.0 [41.0 - 47.0] | 43.0 [40.0 - 47.3] | 44.0 [39.0 - 46.0] |
| Protein, g                                | 66.8 [55.3 - 76.3] | 55.4 [46.0 - 67.5] | 58.1 [49.1 - 64.4] | 62.2 [55.5 - 68.6] | 62.1 [52.8 - 67.7] |
| Protein, g/kg body weight*                | 0.88 [0.74 - 1.11] | 0.81 [0.69 - 0.92] | 0.85 [0.71 - 1.01] | 0.87 [0.78 - 1.08] | 0.87 [0.79 - 1.02] |
| Fiber, g                                  | 24.5 (7.8)         | 36.8 (9.9)         | 36.1 (9.9)         | 34.9 (10.7)        | 34.1 (10.9)        |
| Fiber, g/1000 kcal                        | 14.2 (4.0)         | 21.9 (4.6)         | 21.3 (4.7)         | 19.5 (5.6)         | 18.7 (5.2)         |
| <b>Physical activity, n</b>               | 76                 | 72                 | 72                 | 64                 | 57                 |
| min/wk                                    | 158 [94 - 255]     | 193 [123 - 298]    | 193 [120 - 269]    | 158 [109 - 290]    | 188 [105 - 305]    |
| <b>Stress reducing activities, n</b>      | 75                 | 74                 | 73                 | 63                 | 58                 |
| min/wk                                    | 22 [10 - 55]       | 33 [20 - 59]       | 36 [10 - 55]       | 25 [11 - 66]       | 35 [20 - 63]       |
| <b>Lifestyle Index adherence score, n</b> |                    |                    | 72                 | 64                 | 58                 |
| Total score**                             |                    |                    | 1.05 [0.86 - 1.21] | 0.95 [0.80 - 1.21] | 0.99 [0.78 - 1.22] |
| Adherence meetings                        |                    |                    | 0.90 [0.90 - 1.00] | -                  | -                  |
| Adherence exercise                        |                    |                    | 1.34 [1.03 - 1.58] | 1.23 [0.78 - 1.54] | 1.21 [0.63 - 1.69] |
| Adherence stress                          |                    |                    | 0.67 [0.17 - 0.93] | 0.53 [0.19 - 1.05] | 0.70 [0.33 - 1.00] |
| Adherence diet                            |                    |                    | 1.43 (0.32)        | 1.32 (0.32)        | 1.25 (0.33)        |

Lifestyle descriptives at start and end of the 4-month intervention period as well as during the 1-year extension study (6 and 12 months after completing the intervention).

Continuous variables reported as mean (SD) when normally distributed or as median [IQR] when skewed. kcal = kilocalories, energy% = percentage of total energy in kilocalories.

\*Adjustment of body weight for participants with a BMI  $\geq$  30 to match a BMI of 27.5. \*\*Lifestyle index adherence score based on four components: meeting attendance, exercise activity, stress relieving activity, diet.

**Supplementary Table 7.** Lifestyle descriptives for osteoarthritis participants in the Plants for Joints one-year extension study

|                                           | Intervention       |                    | End                | Extension study    |                    |
|-------------------------------------------|--------------------|--------------------|--------------------|--------------------|--------------------|
|                                           | Start              | Halfway            |                    | 6 months           | 12 months          |
| <b>Diet characteristics, n</b>            | 56                 | 41                 | 47                 | 34                 | 41                 |
| Energy, kcal                              | 1803 (447)         | 1699 (270)         | 1691 (301)         | 1781 (275)         | 1682 (273)         |
| Fat, g                                    | 74.3 [57.7 - 94.2] | 66.5 [60.5 - 76.3] | 69.8 [58.7 - 81.7] | 70.8 [61.1 - 82.7] | 68.2 [61.7 - 82.7] |
| Fat, energy%                              | 38.0 [33.8 - 41.3] | 37.6 [32.5 - 40.6] | 37.8 [34.2 - 40.6] | 35.9 [32.3 - 40.6] | 37.3 [35.3 - 41.2] |
| Saturated fat, g                          | 24.5 [16.5 - 31.2] | 12.7 [10.2 - 16.9] | 13.0 [11.1 - 16.1] | 14.7 [10.7 - 21.2] | 14.3 [11.4 - 22.5] |
| Saturated fat, energy%                    | 12.6 [9.3 - 14.5]  | 6.9 [6.2 - 8.6]    | 7.5 [6.2 - 8.8]    | 7.6 [6.2 - 9.7]    | 7.6 [6.7 - 10.5]   |
| Carbohydrate, g                           | 178.0 (41.4)       | 184.9 (33.8)       | 174.4 (46.0)       | 186.5 (53.9)       | 170.0 (44.9)       |
| Carbohydrate, energy%                     | 39.8 [35.6 - 44.6] | 42.7 [39.0 - 47.0] | 41.9 [38.9 - 46.1] | 42.6 [39.6 - 47.2] | 42.9 [38.7 - 45.9] |
| Protein, g                                | 69.6 [59.5 - 83.7] | 56.5 [53.0 - 65.0] | 61.3 [52.3 - 69.2] | 65.7 [56.6 - 74.3] | 58.6 [52.8 - 69.5] |
| Protein, g/kg body weight*                | 0.90 [0.76 - 1.07] | 0.74 [0.65 - 0.85] | 0.79 [0.67 - 0.86] | 0.79 [0.73 - 0.95] | 0.78 [0.67 - 0.93] |
| Fiber, g                                  | 22.9 [19.2 - 32.2] | 36.1 [31.8 - 42.2] | 33.1 [29.5 - 42.3] | 34.2 [27.1 - 41.8] | 33.2 [25.3 - 40.0] |
| Fiber, g/1000 kcal                        | 12.9 [11.3 - 17.2] | 21.4 [19.0 - 24.8] | 20.5 [17.3 - 23.9] | 21.3 [15.8 - 24.2] | 21.1 [15.6 - 23.5] |
| <b>Physical activity, n</b>               | 62                 | 58                 | 58                 | 49                 | 47                 |
| min/wk                                    | 190 [101 - 279]    | 181 [122 - 287]    | 189 [111 - 303]    | 228 [123 - 333]    | 195 [144 - 333]    |
| <b>Stress reducing activities, n</b>      | 61                 | 57                 | 56                 | 50                 | 47                 |
| min/wk                                    | 33 [0 - 55]        | 44 [15 - 60]       | 33 [9 - 62]        | 33 [10 - 70]       | 35 [8 - 66]        |
| <b>Lifestyle Index adherence score, n</b> |                    |                    | 58                 | 50                 | 47                 |
| Total score**                             |                    |                    | 1.02 [0.82 - 1.23] | 1.04 [0.82 - 1.12] | 1.08 [0.88 - 1.27] |
| Adherence meetings                        |                    |                    | 0.90 [0.90 - 1.00] | -                  | -                  |
| Adherence exercise                        |                    |                    | 1.19 [0.88 - 1.69] | 1.45 [0.85 - 1.81] | 1.34 [1.01 - 1.81] |
| Adherence stress                          |                    |                    | 0.59 [0.16 - 1.01] | 0.55 [0.27 - 1.17] | 0.67 [0.15 - 1.05] |
| Adherence diet                            |                    |                    | 1.47 [1.22 - 1.62] | 1.45 [1.10 - 1.63] | 1.50 [1.06 - 1.62] |

Lifestyle descriptives at start and end of the 4-month intervention period as well as during the 1-year extension study (6 and 12 months after completing the intervention). Continuous variables reported as mean (SD) when normally distributed or as median [IQR] when skewed. kcal = kilocalories, energy% = percentage of total energy in kilocalories. \*Adjustment of body weight for participants with a BMI  $\geq$  30 to match a BMI of 27.5. \*\*Lifestyle index adherence score based on four components: meeting attendance, exercise activity, stress relieving activity, diet.

**Supplementary Table 8.** Effect of adherence on DAS28 for participants with rheumatoid arthritis and total WOMAC score for participants with osteoarthritis

|                                            | Rheumatoid arthritis |                     |                 | Osteoarthritis     |                        |                 |
|--------------------------------------------|----------------------|---------------------|-----------------|--------------------|------------------------|-----------------|
|                                            | DAS28 within group   |                     |                 | WOMAC within group |                        |                 |
|                                            | <i>n</i> =           | difference (95% CI) | <i>p</i> -value | <i>n</i> =         | difference (95% CI)    | <i>p</i> -value |
| <b>Lifestyle Index Adherence Score</b>     |                      |                     |                 |                    |                        |                 |
| Low                                        | 19                   | -0.7 (-1.2 to -0.3) | <0.001          | 16                 | -4.8 (-10.9 to 1.4)    | 0.1             |
| Moderate                                   | 18                   | -1.1 (-1.5 to -0.6) | <0.001          | 15                 | -8.5 (-14.8 to -2.1)   | <0.01           |
| High                                       | 21                   | -1.2 (-1.6 to -0.7) | <0.001          | 16                 | -11.6 (-17.7 to -5.5)  | <0.001          |
| <b>Saturated fat, energy%</b>              |                      |                     |                 |                    |                        |                 |
| Low                                        | 16                   | -1.0 (-1.4 to -0.5) | <0.001          | 14                 | -19.4 (-26.0 to -12.9) | <0.001          |
| Moderate                                   | 16                   | -1.3 (-1.8 to -0.8) | <0.001          | 13                 | -5.4 (-12.2 to 1.4)*   | 0.1             |
| High                                       | 17                   | -0.7 (-1.2 to 0.3)  | 0.002           | 14                 | -2.0 (-8.5 to 4.5)*    | 0.6             |
| <b>Fiber, g/1000kcal</b>                   |                      |                     |                 |                    |                        |                 |
| Low                                        | 16                   | -1.1 (-1.6 to 0.6)  | <0.001          | 14                 | -2.9 (-9.7 to 3.9)     | 0.4             |
| Moderate                                   | 16                   | -0.9 (-1.4 to -0.4) | <0.001          | 13                 | -10.2 (-17.3 to -3.2)  | 0.01            |
| High                                       | 17                   | -1.0 (-1.5 to -0.6) | <0.001          | 14                 | -14.0 (-20.8 to -7.2)* | <0.001          |
| <b>Physical activity, min/wk</b>           |                      |                     |                 |                    |                        |                 |
| Low                                        | 19                   | -0.7 (-1.2 to -0.3) | 0.001           | 16                 | -8.7 (-15.3 to -2.1)   | 0.01            |
| Moderate                                   | 19                   | -1.1 (-1.6 to -0.7) | <0.001          | 15                 | -8.4 (-14.8 to -2.0)   | 0.01            |
| High                                       | 19                   | -1.1 (-1.6 to -0.7) | <0.001          | 19                 | -6.9 (-12.5 to -1.2)   | 0.02            |
| <b>Stress-relieving activities, min/wk</b> |                      |                     |                 |                    |                        |                 |
| Low                                        | 17                   | -1.0 (-1.4 to -0.5) | <0.001          | 16                 | -1.1 (-7.8 to 5.5)     | 0.7             |
| Moderate                                   | 20                   | -1.0 (-1.4 to -0.6) | <0.001          | 16                 | -11.6 (-17.8 to -5.4)* | <0.001          |
| High                                       | 21                   | -1.0 (-1.4 to -0.5) | <0.001          | 18                 | -9.7 (-15.5 to -3.8)*  | 0.001           |

A linear mixed model between DAS28 (rheumatoid arthritis participants) or WOMAC score (osteoarthritis participants) at start intervention to end of the one-year extension study with tertiles of the adherence score or its components as interaction terms was used. A *p*-value <0.1 was considered statistically significant. Significant differences between tertiles are indicated as \* with low as the reference, there were no significant differences found with high as the reference. Tertile cut-off points for rheumatoid arthritis (RA): Lifestyle Index Adherence Score lower: 0.83, upper: 1.13; saturated fat: lower: 7.89%, upper: 10.67%; fiber: lower: 17.55, upper: 20.61; physical activity: lower: 127.5, upper: 270.7; stress-relieving activities: lower: 22, upper: 50. Tertile cut-off points for osteoarthritis (MSOA): Lifestyle Index Adherence Score: lower: 0.93, upper: 1.20; saturated fat: lower: 6.98%, upper: 9.27%; fiber: lower: 17.01, upper: 22.91; physical activity: lower: 157.5, upper: 262.5; stress-relieving activities: lower: 11, upper: 44.



Supplementary Table 9. Adverse events for participants with rheumatoid arthritis or osteoarthritis during the one-year extension study of the Plants for joints study

| Type                        | Time point                | Description                                   | Serious AE | Severity | Related to the intervention |
|-----------------------------|---------------------------|-----------------------------------------------|------------|----------|-----------------------------|
| <b>Rheumatoid arthritis</b> |                           |                                               |            |          |                             |
| Infection                   | Halfway semicross control | Fever and sore muscles                        | No         | Mild     | No                          |
| Other                       | Halfway semicross control | Granuloma annulare                            | No         | Mild     | No                          |
| Abnormal blood result       | Halfway semicross control | Leukopenia                                    | No         | Mild     | No                          |
| Other                       | Halfway semicross control | Migraine                                      | No         | Mild     | No                          |
| Infection                   | Halfway semicross control | Viral gastroenteritis                         | No         | Mild     | No                          |
| Abdominal complaints        | Halfway semicross control | Flatulence                                    | No         | Mild     | Possible                    |
| Abdominal complaints        | Halfway semicross control | Light constipation                            | No         | Mild     | Unlikely                    |
| Other                       | Halfway semicross control | Migraine                                      | No         | Mild     | Unlikely                    |
| Other                       | Halfway semicross control | Esophagus spasms                              | No         | Mild     | Unknown                     |
| Other                       | Halfway semicross control | Thirst                                        | No         | Mild     | Unlikely                    |
| Abdominal complaints        | Halfway semicross control | Flatulence and bloating                       | No         | Mild     | Possible                    |
| Other                       | Halfway semicross control | Dizziness                                     | No         | Mild     | Unknown                     |
| Abdominal complaints        | Halfway semicross control | Diarrhea                                      | No         | Mild     | Possible                    |
| Abdominal complaints        | Halfway semicross control | Diarrhea                                      | No         | Mild     | Possible                    |
| Abdominal complaints        | Halfway semicross control | Flatulence                                    | No         | Mild     | Possible                    |
| Abdominal complaints        | Halfway semicross control | Headache                                      | No         | Mild     | Unlikely                    |
| Other                       | Halfway semicross control | Low blood pressure                            | No         | Mild     | Possible                    |
| Abdominal complaints        | Halfway semicross control | Flatulence                                    | No         | Mild     | Possible                    |
| Other                       | End semicross control     | Breast cancer diagnosis                       | No         | Moderate | No                          |
| Other                       | End semicross control     | Nerve pinchment (back)                        | No         | Moderate | No                          |
| Other                       | End semicross control     | Erythema nodosum                              | No         | Mild     | No                          |
| Abdominal complaints        | End semicross control     | Bloating and eructation                       | No         | Mild     | Possible                    |
| Other                       | End semicross control     | Irregular menstrual cycles                    | No         | Mild     | Unknown                     |
| Abdominal complaints        | End semicross control     | Diarrhea                                      | No         | Mild     | Possible                    |
| Abdominal complaints        | End semicross control     | Gastric reflux                                | No         | Mild     | Unlikely                    |
| Other                       | End semicross control     | Perceived loss of muscle and physical fitness | No         | Mild     | Possible                    |
| Infection                   | Extension study 6 m       | COVID-19 infection                            | No         | Mild     | No                          |
| Other                       | Extension study 6 m       | Cardiac arrhythmia                            | Yes        | Moderate | No                          |
| Infection                   | Extension study 6 m       | COVID-19 infection                            | No         | Mild     | No                          |
| Other                       | Extension study 6 m       | Pale stool                                    | No         | Mild     | No                          |
| Abnormal blood result       | Extension study 6 m       | Abnormal liver enzymes                        | No         | Mild     | No                          |
| Infection                   | Extension study 6 m       | Urinary tract infection                       | No         | Mild     | No                          |
| Infection                   | Extension study 6 m       | Pneumonia                                     | Yes        | Moderate | No                          |
| Other                       | Extension study 6 m       | Diagnosis lung cancer                         | Yes        | Moderate | No                          |
| Infection                   | Extension study 6 m       | Herpes Zoster infection                       | No         | Mild     | No                          |
| Infection                   | Extension study 6 m       | Urinary tract infection                       | No         | Mild     | No                          |
| Other                       | Extension study 6 m       | Hair thinning                                 | No         | Mild     | Unknown                     |
| Other                       | Extension study 6 m       | Muscle loss                                   | No         | Mild     | Possible                    |
| Abdominal complaints        | Extension study 6 m       | Gastric reflux                                | No         | Mild     | Unlikely                    |
| Other                       | Extension study 6 m       | Forgetfulness                                 | No         | Mild     | Unlikely                    |
| Other                       | Extension study 6 m       | Unwanted weightloss                           | No         | Mild     | Possible                    |
| Abdominal complaints        | Extension study 6 m       | Bloating                                      | No         | Mild     | Possible                    |
| Abdominal complaints        | Extension study 6 m       | Abdominal cramps                              | No         | Mild     | Possible                    |
| Abdominal complaints        | Extension study 6 m       | Flatulence                                    | No         | Mild     | Possible                    |
| Abdominal complaints        | Extension study 6 m       | Flatulence                                    | No         | Mild     | Possible                    |
| Other                       | Extension study 6 m       | Dizziness                                     | No         | Mild     | Unknown                     |
| Abdominal complaints        | Extension study 6 m       | Gastric reflux                                | No         | Mild     | Unlikely                    |
| Infection                   | Extension study 12 m      | Urinary tract infection                       | No         | Mild     | No                          |
| Infection                   | Extension study 12 m      | Urinary tract infection                       | No         | Mild     | No                          |
| Other                       | Extension study 12 m      | Diagnosis familial hypertension               | No         | Mild     | No                          |
| Infection                   | Extension study 12 m      | COVID-19 infection                            | No         | Mild     | No                          |
| Other                       | Extension study 12 m      | Neuritis vestibularis                         | No         | Mild     | No                          |
| Infection                   | Extension study 12 m      | Shingles                                      | No         | Mild     | No                          |
| Other                       | Extension study 12 m      | Hypertensive crisis                           | Yes        | Moderate | No                          |
| Infection                   | Extension study 12 m      | COVID-19 infection                            | No         | Mild     | No                          |
| Infection                   | Extension study 12 m      | COVID-19 infection                            | No         | Mild     | No                          |
| Other                       | Extension study 12 m      | Hairloss                                      | No         | Mild     | Unlikely                    |
| Infection                   | Extension study 12 m      | COVID-19 infection                            | No         | Mild     | No                          |
| Other                       | Extension study 12 m      | Viral gastroenteritis                         | No         | Mild     | No                          |
| Other                       | Extension study 12 m      | Herpes zoster                                 | No         | Mild     | No                          |
| Infection                   | Extension study 12 m      | COVID-19 infection                            | No         | Mild     | No                          |
| Abdominal complaints        | Extension study 12 m      | Carpal tunnel syndrome                        | No         | Mild     | No                          |
| Infection                   | Extension study 12 m      | Flu                                           | No         | Mild     | No                          |
| Abdominal complaints        | Extension study 12 m      | Stomach pain                                  | No         | Mild     | No                          |
| Other                       | Extension study 12 m      | Pale stool                                    | No         | Mild     | No                          |
| Infection                   | Extension study 12 m      | Eye infection                                 | No         | Mild     | No                          |
| Other                       | Extension study 12 m      | Hemorrhoids (neck)                            | No         | Mild     | No                          |
| Infection                   | Extension study 12 m      | COVID-19 infection                            | No         | Mild     | No                          |
| Infection                   | Extension study 12 m      | COVID-19 infection                            | No         | Mild     | No                          |
| Abdominal complaints        | Extension study 12 m      | Bloating                                      | No         | Mild     | Possible                    |
| Other                       | Extension study 12 m      | Frozen shoulder                               | No         | Mild     | No                          |
| Other                       | Extension study 12 m      | Hearing loss                                  | No         | Mild     | No                          |
| Abdominal complaints        | Extension study 12 m      | Constipation                                  | No         | Mild     | Unlikely                    |
| Abdominal complaints        | Extension study 12 m      | Bloating and flatulence                       | No         | Mild     | Possible                    |
| Other                       | Extension study 12 m      | Tear in biceps tendon                         | No         | Mild     | No                          |
| <b>Osteoarthritis</b>       |                           |                                               |            |          |                             |
| Abdominal complaints        | Halfway semicross control | Constipation                                  | No         | Mild     | Unlikely                    |
| Abdominal complaints        | Halfway semicross control | Diarrhea                                      | No         | Mild     | Unknown                     |
| Other                       | Halfway semicross control | Headache                                      | No         | Mild     | Unlikely                    |
| Abdominal complaints        | End semicross control     | Gallstones                                    | No         | Mild     | Unlikely                    |
| Infection                   | End semicross control     | Urinary tract infection                       | No         | Mild     | No                          |
| Other                       | End semicross control     | Torn shoulder muscle                          | No         | Mild     | No                          |
| Other                       | End semicross control     | Torn muscle from horseback riding             | No         | Mild     | No                          |
| Abdominal complaints        | End semicross control     | Gastric reflux                                | No         | Mild     | Unlikely                    |
| Infection                   | Extension study 6 m       | Pneumonia                                     | No         | Mild     | No                          |
| Infection                   | Extension study 6 m       | Herpes infection eye                          | No         | Mild     | No                          |
| Infection                   | Extension study 6 m       | Urinary tract infection                       | No         | Mild     | No                          |
| Infection                   | Extension study 6 m       | Flu                                           | No         | Mild     | No                          |
| Other                       | Extension study 6 m       | COVID-19 infection                            | No         | Mild     | No                          |
| Other                       | Extension study 6 m       | Hemorrhoids and colon polyps                  | No         | Mild     | No                          |
| Other                       | Extension study 6 m       | Bursitis (hip)                                | No         | Mild     | No                          |
| Other                       | Extension study 6 m       | Diagnosis skin cancer (nose)                  | No         | Mild     | No                          |
| Other                       | Extension study 6 m       | Diagnosis atypical migraine                   | No         | Mild     | Unlikely                    |
| Other                       | Extension study 6 m       | Diagnosis melanoma                            | No         | Mild     | No                          |
| Abdominal complaints        | Extension study 6 m       | General abdominal complaints                  | No         | Mild     | Possible                    |
| Abdominal complaints        | Extension study 6 m       | Flatulence and abdominal cramps               | No         | Mild     | Possible                    |
| Other                       | Extension study 6 m       | Nausea                                        | No         | Mild     | Unlikely                    |
| Other                       | Extension study 6 m       | Dizziness and headache                        | No         | Mild     | Unknown                     |
| Other                       | Extension study 6 m       | Rash (abdomen)                                | No         | Mild     | Unlikely                    |
| Other                       | Extension study 6 m       | Tinnitus and poor hearing                     | No         | Mild     | No                          |
| Other                       | Extension study 6 m       | Headache                                      | No         | Mild     | Unlikely                    |
| Other                       | Extension study 6 m       | Hair thinning                                 | No         | Mild     | Unknown                     |
| Other                       | Extension study 12 m      | Hemorrhoids                                   | No         | Mild     | No                          |
| Infection                   | Extension study 12 m      | COVID-19 infection                            | No         | Mild     | No                          |
| Infection                   | Extension study 12 m      | Infected jaw implant                          | No         | Mild     | No                          |
| Infection                   | Extension study 12 m      | Upper urinary tract infection                 | No         | Mild     | No                          |
| Other                       | Extension study 12 m      | Broken hand due to fall                       | No         | Mild     | Unlikely                    |
| Infection                   | Extension study 12 m      | COVID-19 infection                            | Yes        | Severe   | No                          |
| Infection                   | Extension study 12 m      | Diagnosis breast cancer                       | Yes        | Moderate | No                          |
| Infection                   | Extension study 12 m      | Helicobacter Pylori gastritis                 | No         | Mild     | No                          |
| Other                       | Extension study 12 m      | Cardiac arrhythmia                            | Yes        | Moderate | No                          |
| Infection                   | Extension study 12 m      | COVID-19 infection                            | No         | Mild     | No                          |
| Other                       | Extension study 12 m      | Colon polyps                                  | No         | Mild     | No                          |
| Infection                   | Extension study 12 m      | Urinary tract infection                       | Yes        | Mild     | No                          |
| Infection                   | Extension study 12 m      | COVID-19 infection                            | No         | Mild     | No                          |
| Infection                   | Extension study 12 m      | Infection jaw                                 | No         | Mild     | No                          |
| Infection                   | Extension study 12 m      | Vaginal yeast infection                       | No         | Mild     | No                          |
| Infection                   | Extension study 12 m      | Eye infection                                 | Yes        | Mild     | No                          |
| Other                       | Extension study 12 m      | Bursitis (hip)                                | No         | Mild     | No                          |
| Infection                   | Extension study 12 m      | Urinary tract infection                       | No         | Mild     | No                          |
| Other                       | Extension study 12 m      | Broken wrist after fall                       | No         | Moderate | Unlikely                    |
| Abnormal blood result       | Extension study 12 m      | Iron deficiency anemia                        | No         | Mild     | Possible                    |
| Infection                   | Extension study 12 m      | COVID-19 infection                            | No         | Mild     | No                          |
| Other                       | Extension study 12 m      | Infected nail                                 | No         | Mild     | No                          |
| Infection                   | Extension study 12 m      | COVID-19 infection                            | No         | Mild     | No                          |
| Abdominal complaints        | Extension study 12 m      | Diarrhea after antibiotic use                 | No         | Mild     | No                          |
| Other                       | Extension study 12 m      | Dry mouth                                     | No         | Mild     | Unlikely                    |
| Other                       | Extension study 12 m      | Rash (hands)                                  | No         | Mild     | Unlikely                    |
| Other                       | Extension study 12 m      | Tendinitis                                    | No         | Mild     | No                          |
| Abdominal complaints        | Extension study 12 m      | Gastric reflux                                | No         | Mild     | Unlikely                    |
| Other                       | Extension study 12 m      | Burnout                                       | No         | Mild     | Unlikely                    |
